# Supplementary material for: High-throughput immunosensor chip coupled with a fluorescent DNA dendrimer for ultrasensitive detection of cardiac troponin T
Source: Royal Society of Chemistry journal article supplement (doi:10.1039/d1ra03420k), 2021-01-01
Supplement: d1ra03420k1.pdf [file d1ra03420k1.pdf]

# High-throughput immunosensor chip coupled with a fluorescent DNA dendrimer for ultrasensitive detection of cardiac troponin T

*Ruike Wang, †, a, b Chen Zong, †, b Gairu Li, a Junhong Wang, c Tiantian Kong, \* d Fei Li \* a, b  
and Junmin Chang \* a*

<sup>a</sup> College of Pharmacy, Xinjiang Medical University, Urumqi, 830011, P.R. China.

<sup>b</sup> State Key Laboratory of Natural Medicines, China Pharmaceutical University, Nanjing  
210009, P.R. China.

<sup>c</sup> Jiangsu Province Hospital and Nanjing Medical University First Affiliated Hospital, Nanjing  
210029, P.R. China.

<sup>d</sup> Xinjiang Medical University Affiliated Second Hospital, Urumqi, 830063, P.R. China.

\*Corresponding author. Tel. / Fax: +86-0991-2110353

E-mail address: [cjmcjn2471@sohu.com](mailto:cjmcjn2471@sohu.com) (J. M. Chang), [lifeicpu@163.com](mailto:lifeicpu@163.com) (F. Li),  
[ktiantian\\_22@126.com](mailto:ktiantian_22@126.com) (T. T. Kong)

† R. K. Wang and C. Zong contributed equally.

## **Contents**

|                                 |           |
|---------------------------------|-----------|
| <b>1. Supporting Tables</b>     | <b>S1</b> |
| <b>2. Supporting Figures</b>    | <b>S3</b> |
| <b>3. Supporting References</b> | <b>S5</b> |

## 1. Supporting Tables

**Table S1.** Oligonucleotides employed in this assay.

| Oligonucleotides    | Sequences of oligonucleotides (5'-3')                                           |
|---------------------|---------------------------------------------------------------------------------|
| Y <sub>0a</sub>     | AACCGATGGATGATGCATCTGCATGACATTCGTCGTAAG                                         |
| Y <sub>0b</sub>     | AACCGATGGATGACTTACGACGAATGACCGAATCAGCC<br>T                                     |
| Y <sub>0c</sub>     | AACCGATGGATGAAGGCTGATTCGGTTCATGCAGATGC<br>A                                     |
| Y <sub>1a</sub>     | TCATCCATCGGTTTGCATCTGCATGACATTCGTCGTAAG                                         |
| Y <sub>1b</sub>     | AAAGCCACTCTGACTTACGACGAATGACCGAATCAGCCT                                         |
| Y <sub>1c</sub>     | AAAGCCACTCTGAAGGCTGATTCGGTTCATGCAGATGCA                                         |
| Y <sub>2a</sub>     | TCAGAGTGGCTTTTGCATCTGCATGACATTCGTCGTAAG                                         |
| Y <sub>2b</sub>     | CTGTCATCGGTGACTTACGACGAATGACCGAATCAGCCT                                         |
| Y <sub>2c</sub>     | CTGTCATCGGTGAAGGCTGATTCGGTTCATGCAGATGCA                                         |
| Y <sub>3a</sub>     | TCACCGATGACAGTGCATCTGCATGACATTCGTCGTAAG                                         |
| Y <sub>3b</sub>     | AACACATCGAGGTCTTACGACGAATGACCGAATCAGCC<br>T                                     |
| Y <sub>3c</sub>     | AACACATCGAGGTAGGCTGATTCGGTTCATGCAGATGCA                                         |
| Y <sub>4a</sub>     | ACCTCGATGTGTTTGCATCTGCATGACATTCGTCGTAAG                                         |
| Y <sub>4b</sub>     | TGCTGTCTGTCCACTTACGACGAATGACCGAATCAGCCT                                         |
| Y <sub>4c-Cy5</sub> | Cy5-<br>TGCTGTCTGTCCAAGGCTGATTCGGTTCATGCAGATGCA                                 |
| Y <sub>4c-Bio</sub> | Biotin-<br>AAAAAAAAAAAAAAAAAAAAAAAAATGCTGTCTGTCCAAGGCT<br>GATTCGGTTCATGCAGATGCA |
| sDNA-Cy5            | Biotin-<br>AAAAAAAAAAAAAAAAAAAAAAAAATGCTGTCTGTCCAAGGCT                          |

---

---

GATTCGGTTCATGCAGATGCA-Cy5

---

---

**Table S2.** An overview of ultrasensitive detection of cTnT using different amplification strategies.

| <b>Signal amplification</b>                                  | <b>Detection range</b>                       | <b>Detection limit</b>   | <b>References</b> |
|--------------------------------------------------------------|----------------------------------------------|--------------------------|-------------------|
| FL immunosensor based on DNA dendrimers                      | $2.0 \times 10^{-4}$ -2.0 ng L <sup>-1</sup> | 0.10 pg L <sup>-1</sup>  | This work         |
| FL immunosensor based on förster resonance energy transfer   | 0.1-50 ng mL <sup>-1</sup>                   | 0.12 ng mL <sup>-1</sup> | S1                |
| Electrochemical sensor based on a MIP                        | 0.009-0.8 ng mL <sup>-1</sup>                | 9 pg mL <sup>-1</sup>    | S2                |
| Electrochemical sensor based on a N-MIP                      | 0.01-0.1 ng mL <sup>-1</sup>                 | 6 pg mL <sup>-1</sup>    | S3                |
| Electrochemical immunosensor based on gold nanoparticles     | 0.20-1.00 ng mL <sup>-1</sup>                | 0.1 ng mL <sup>-1</sup>  | S4                |
| SPR immunosensor                                             | 0.5-40 ng mL <sup>-1</sup>                   | 0.5 ng mL <sup>-1</sup>  | S5                |
| DNA-guided detection method based on the 9G DNAChip platform | 1-120 pg mL <sup>-1</sup>                    | 870 pg L <sup>-1</sup>   | S6                |

## 2. Supporting Figures

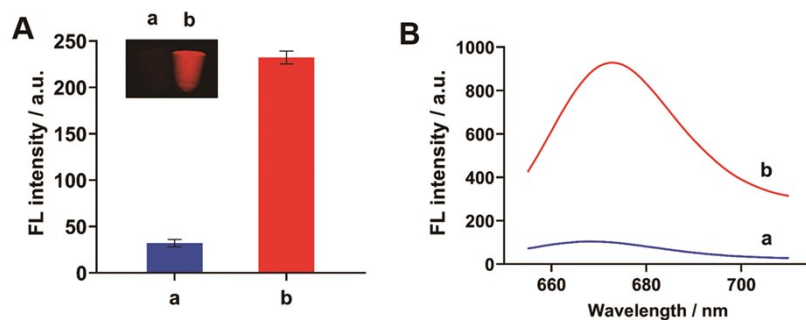

**Fig. S1** (A) Fluorescent image and intensity bar diagram of 0.72  $\mu\text{M}$  of sDNA-Cy5 (a) and FDD@Cy5 (b) under homogeneous conditions. (B) Fluorescent spectra of 0.72  $\mu\text{M}$  of sDNA-Cy5 (a) and FDD@Cy5 (b) under homogeneous conditions.

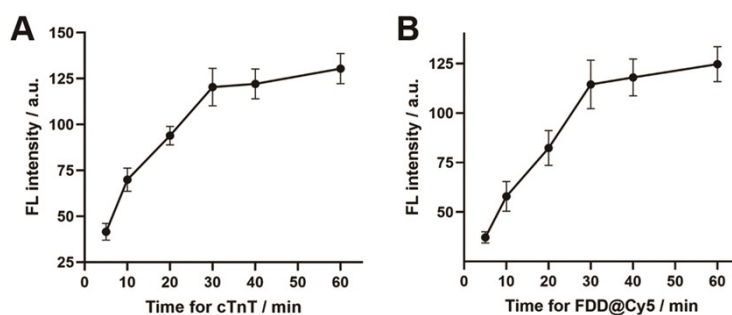

**Fig. S2** Effects of incubation times for (A) cTnT and (B) FDD@Cy5 on FL intensity. 0.20  $\text{ng L}^{-1}$  cTnT was used for optimal experiments. Number of experiments was 9.

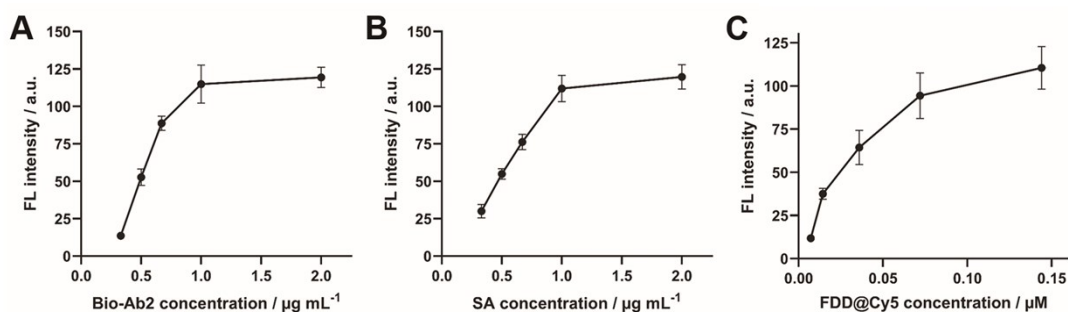

**Fig. S3** Effects of incubation concentrations for (A) Bio-Ab2, (B) SA and (C) FDD@Cy5 on FL intensity. 0.20  $\text{ng L}^{-1}$  cTnT was used for optimal experiments. Number of experiments was 9.

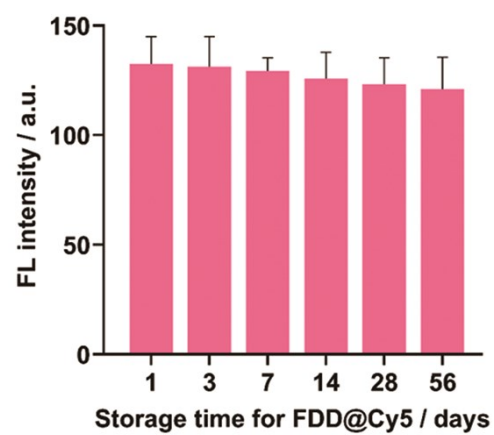

**Fig. S4** FL responses from cTnT immunosensor chip to  $0.20 \text{ ng L}^{-1}$  cTnT using FDD@Cy5

stored after different days. Number of experiments was 9.

---

## Supporting References

- [1] S. Gogoi and R. Khan, *Phys. Chem. Chem. Phys.*, 2018, **20**, 16501–16509.
- [2] N. Karimian, M. Vagin, M. H. A. Zavar, M. Chamsaz, A. P. Turner and A. Tiwari, *Biosens. Bioelectron.*, 2013, **50**, 492–498.
- [3] B. V. Silva, B. A. Rodríguez, G. F. Sales, M. D. P. T. Sotomayor and R. F. Dutra, *Biosens. Bioelectron.*, 2016, **77**, 978–985.
- [4] D. Brondani, J. V. Piovesan, E. Westphal, H. Gallardo, R. A. F. Dutra, A. Spinelli and L. C. Vieira, *Analyst*, 2014, **139**, 5200–5208.
- [5] M. Pawula, Z. Altintas and I. E. Tothill, *Talanta*, 2016, **146**, 823–830.
- [6] K. S. Song, S. B. Nimse, M. D. Sonawane, Y. H. Lin, Z. Zhou and T. Kim, *Analyst*, 2017, **142**, 3816–3821.
